# Supplementary material
Source: publisher figshare collection journal article supplement (https://acs.figshare.com/ndownloader/files/5152318)
Supplement: Supplementary file 1 [file 5152318]

## Supporting information

### Raman spectra and corresponding strain effects in graphyne and graphdiyne

Shuqing Zhang,<sup>†,‡</sup> Jinying Wang,<sup>†</sup> Zhenzhu Li,<sup>†,‡</sup> Ruiqi Zhao,<sup>§</sup> Lianming Tong,<sup>†</sup> Zhongfan Liu,<sup>†,‡</sup> Jin Zhang\*,<sup>†,‡</sup> and Zhirong Liu\*,<sup>†,‡</sup>

<sup>†</sup>Center for Nanochemistry, College of Chemistry and Molecular Engineering, Peking University, Beijing 100871, PR China

<sup>‡</sup>Academy for Advanced Interdisciplinary Studies, Peking University, Beijing, 100871, P. R. China

<sup>§</sup>School of Physics and Chemistry, Henan Polytechnic University, Henan 454003, China

#### AUTHOR INFORMATION

#### Corresponding Author

\* E-mail: jinzhang@pku.edu.cn, LiuZhiRong@pku.edu.cn.

**1) Detailed process for deducing the frequency response functions linking small strain with the doubly degenerate  $E_{2g}$  Raman-active mode.**

For a two-dimensional system under mechanical strain, a doubly degenerate mode splits into two bands. The energies of the splitting modes are the eigenvalues of the corresponding Hamiltonian:

$$\hat{H} = \begin{bmatrix} a & c \\ c & b \end{bmatrix} \quad (1)$$

where  $a$ ,  $b$ , and  $c$  are matrix elements. The solutions of Eq. (1) are:

$$\omega_{1,2} = \frac{(a + b) \pm \sqrt{(a - b)^2 + 4c^2}}{2} \quad (2)$$

$a$ ,  $b$ , and  $c$  under small strain can be expanded as:

$$\begin{cases} a = a_0 + \alpha_1 \varepsilon_{xx} + \beta_1 \varepsilon_{yy} + \chi_1 \varepsilon_{xy} \\ b = b_0 + \alpha_2 \varepsilon_{xx} + \beta_2 \varepsilon_{yy} + \chi_2 \varepsilon_{xy} \\ c = c_0 + \alpha_3 \varepsilon_{xx} + \beta_3 \varepsilon_{yy} + \chi_3 \varepsilon_{xy} \end{cases} \quad (3)$$

The original state is degenerate, whose frequency is  $\omega_0$ , so for an unstrained structure:

$$a = b, c = 0 \quad (4)$$

such that  $a_0 = b_0 = \omega_0, c_0 = 0$ . Under strain, the split frequencies can be written as

$$\omega_{1,2} = a_0 + \frac{(\alpha_1 + \alpha_2)\varepsilon_{xx} + (\beta_1 + \beta_2)\varepsilon_{yy} + (\chi_1 + \chi_2)\varepsilon_{xy}}{2} \pm \frac{\sqrt{[(\alpha_1 - \alpha_2)\varepsilon_{xx} + (\beta_1 - \beta_2)\varepsilon_{yy} + (\chi_1 - \chi_2)\varepsilon_{xy}]^2 + 4(\alpha_3\varepsilon_{xx} + \beta_3\varepsilon_{yy} + \chi_3\varepsilon_{xy})^2}}{2} \quad (5)$$

Then, we will solve the relationships of the whole coefficients by symmetry restrictions of the  $D_{6h}$  point group.

(1) Inversion operation: If changing the sign of shear strain ( $\varepsilon_{xy} \rightarrow -\varepsilon_{xy}$ ) in Eq. (5), the frequencies are invariant.

$$\begin{aligned}
\omega_{1,2} &= a_0 + \frac{(\alpha_1 + \alpha_2)\varepsilon_{xx} + (\beta_1 + \beta_2)\varepsilon_{yy} + (\chi_1 + \chi_2)\varepsilon_{xy}}{2} \\
&\quad \pm \frac{\sqrt{[(\alpha_1 - \alpha_2)\varepsilon_{xx} + (\beta_1 - \beta_2)\varepsilon_{yy} + (\chi_1 - \chi_2)\varepsilon_{xy}]^2 + 4(\alpha_3\varepsilon_{xx} + \beta_3\varepsilon_{yy} + \chi_3\varepsilon_{xy})^2}}{2} \\
&\equiv a_0 + \frac{(\alpha_1 + \alpha_2)\varepsilon_{xx} + (\beta_1 + \beta_2)\varepsilon_{yy} - (\chi_1 + \chi_2)\varepsilon_{xy}}{2} \\
&\quad \pm \frac{\sqrt{[(\alpha_1 - \alpha_2)\varepsilon_{xx} + (\beta_1 - \beta_2)\varepsilon_{yy} - (\chi_1 - \chi_2)\varepsilon_{xy}]^2 + 4(\alpha_3\varepsilon_{xx} + \beta_3\varepsilon_{yy} - \chi_3\varepsilon_{xy})^2}}{2}
\end{aligned} \tag{6}$$

Thus, we have

$$\begin{cases} \chi_1 + \chi_2 = 0 \\ (\alpha_1 - \alpha_2)(\chi_1 - \chi_2) + 4\alpha_3\chi_3 = 0 \\ (\beta_1 - \beta_2)(\chi_1 - \chi_2) + 4\beta_3\chi_3 = 0 \end{cases} \tag{7}$$

(2) To apply equivalent uniaxial strain along the  $x$  and  $y$  directions ( $\varepsilon_{xx} = \varepsilon_{yy} = \varepsilon, \varepsilon_{xy} = 0$ ), the symmetry is conserved, and no split happens. Thus,

$$\frac{\sqrt{[(\alpha_1 - \alpha_2)\varepsilon + (\beta_1 - \beta_2)\varepsilon]^2 + 4(\alpha_3\varepsilon + \beta_3\varepsilon)^2}}{2} \equiv 0$$

such that

$$\begin{cases} \alpha_1 + \beta_1 = \alpha_2 + \beta_2 \\ \alpha_3 + \beta_3 = 0 \end{cases} \tag{8}$$

(3) The system is invariable after a 60-degree rotation. The rotation of a second-rank tensor is given generally as

$$\begin{aligned}
\begin{bmatrix} \varepsilon'_{xx} & \varepsilon'_{xy} \\ \varepsilon'_{xy} & \varepsilon'_{yy} \end{bmatrix} &= \begin{bmatrix} \cos\theta & \sin\theta \\ -\sin\theta & \cos\theta \end{bmatrix} \begin{bmatrix} \varepsilon_{xx} & \varepsilon_{xy} \\ \varepsilon_{xy} & \varepsilon_{yy} \end{bmatrix} \begin{bmatrix} \cos\theta & -\sin\theta \\ \sin\theta & \cos\theta \end{bmatrix} \\
&= \begin{bmatrix} \varepsilon_{xx}\cos^2\theta + \varepsilon_{yy}\sin^2\theta + 2\varepsilon_{xy}\sin\theta\cos\theta & \varepsilon_{xy}(\cos^2\theta - \sin^2\theta) - (\varepsilon_{xx} - \varepsilon_{yy})\sin\theta\cos\theta \\ \varepsilon_{xy}(\cos^2\theta - \sin^2\theta) - (\varepsilon_{xx} - \varepsilon_{yy})\sin\theta\cos\theta & \varepsilon_{xx}\sin^2\theta + \varepsilon_{yy}\cos^2\theta - 2\varepsilon_{xy}\sin\theta\cos\theta \end{bmatrix}
\end{aligned} \tag{9}$$

When  $\theta = \frac{\pi}{3}$ , the strain tensor becomes:

$$\begin{bmatrix} \frac{1}{4}\varepsilon_{xx} + \frac{3}{4}\varepsilon_{yy} + \frac{\sqrt{3}}{2}\varepsilon_{xy} & \frac{1}{2}\varepsilon_{xy} - \frac{\sqrt{3}}{4}(\varepsilon_{xx} - \varepsilon_{yy}) \\ \frac{1}{2}\varepsilon_{xy} - \frac{\sqrt{3}}{4}(\varepsilon_{xx} - \varepsilon_{yy}) & \frac{3}{4}\varepsilon_{xx} + \frac{1}{4}\varepsilon_{yy} - \frac{\sqrt{3}}{2}\varepsilon_{xy} \end{bmatrix} \tag{10}$$

Thus, we have:

$$\begin{aligned}
& \omega_{1,2} \\
&= a_0 + \frac{(\alpha_1 + \alpha_2)\varepsilon_{xx} + (\beta_1 + \beta_2)\varepsilon_{yy} + (\chi_1 + \chi_2)\varepsilon_{xy}}{2} \\
&\pm \frac{\sqrt{[(\alpha_1 - \alpha_2)\varepsilon_{xx} + (\beta_1 - \beta_2)\varepsilon_{yy} + (\chi_1 - \chi_2)\varepsilon_{xy}]^2 + 4(\alpha_3\varepsilon_{xx} + \beta_3\varepsilon_{yy} + \chi_3\varepsilon_{xy})^2}}{2} \\
&\equiv a_0 \\
&+ \frac{(\alpha_1 + \alpha_2)\left(\frac{1}{4}\varepsilon_{xx} + \frac{3}{4}\varepsilon_{yy} + \frac{\sqrt{3}}{2}\varepsilon_{xy}\right) + (\beta_1 + \beta_2)\left(\frac{3}{4}\varepsilon_{xx} + \frac{1}{4}\varepsilon_{yy} - \frac{\sqrt{3}}{2}\varepsilon_{xy}\right) - (\chi_1 + \chi_2)\left[\frac{1}{2}\varepsilon_{xy} - \frac{\sqrt{3}}{4}(\varepsilon_{xx} - \varepsilon_{yy})\right]}{2} \\
&\pm \sqrt{\frac{\left\{(\alpha_1 - \alpha_2)\left(\frac{1}{4}\varepsilon_{xx} + \frac{3}{4}\varepsilon_{yy} + \frac{\sqrt{3}}{2}\varepsilon_{xy}\right) + (\beta_1 - \beta_2)\left(\frac{3}{4}\varepsilon_{xx} + \frac{1}{4}\varepsilon_{yy} - \frac{\sqrt{3}}{2}\varepsilon_{xy}\right) + (\chi_1 - \chi_2)\left[\frac{1}{2}\varepsilon_{xy} - \frac{\sqrt{3}}{4}(\varepsilon_{xx} - \varepsilon_{yy})\right]\right\}^2}{2} + 4\alpha_3\left(\frac{1}{4}\varepsilon_{xx} + \frac{3}{4}\varepsilon_{yy} + \frac{\sqrt{3}}{2}\varepsilon_{xy}\right) + \beta_3\left(\frac{3}{4}\varepsilon_{xx} + \frac{1}{4}\varepsilon_{yy} - \frac{\sqrt{3}}{2}\varepsilon_{xy}\right) - \chi_3\left[\frac{1}{2}\varepsilon_{xy} - \frac{\sqrt{3}}{4}(\varepsilon_{xx} - \varepsilon_{yy})\right]^2}{2}}
\end{aligned} \tag{11}$$

The equality of the first term in Eq. (11) gives:

$$\begin{cases}
(\alpha_1 + \alpha_2) = \frac{1}{4}(\alpha_1 + \alpha_2) + \frac{3}{4}(\beta_1 + \beta_2) - \frac{\sqrt{3}}{4}(\chi_1 + \chi_2) \\
(\beta_1 + \beta_2) = \frac{3}{4}(\alpha_1 + \alpha_2) + \frac{1}{4}(\beta_1 + \beta_2) + \frac{\sqrt{3}}{4}(\chi_1 + \chi_2) \\
(\chi_1 + \chi_2) = \frac{\sqrt{3}}{2}(\alpha_1 + \alpha_2) - \frac{\sqrt{3}}{2}(\beta_1 + \beta_2) + \frac{1}{2}(\chi_1 + \chi_2)
\end{cases} \tag{12}$$

Combining with Eq. (7), we have:

$$(\alpha_1 + \alpha_2) = (\beta_1 + \beta_2) \tag{13}$$

Based on Eqs. (7, 8, 13), combined with the definitions  $\bar{\alpha} = \frac{\alpha_1 + \alpha_2}{2} = \frac{\beta_1 + \beta_2}{2}$ ,  $\Delta\alpha = \frac{\alpha_1 - \alpha_2}{2} = \frac{\beta_1 - \beta_2}{2}$ , we have:

$$\begin{cases}
\alpha_1 = \bar{\alpha} - \Delta\alpha \\
\alpha_2 = \bar{\alpha} + \Delta\alpha \\
\beta_1 = \bar{\alpha} + \Delta\alpha \\
\beta_2 = \bar{\alpha} - \Delta\alpha \\
\beta_3 = -\alpha_3 \\
\chi_2 = -\chi_1 \\
\chi_3 = \frac{\Delta\alpha\chi_1}{\alpha_3}
\end{cases} \tag{14}$$

Eq. (14) reduces the number of coefficients from 9 to 4.

The equality of the second term in Eq. (11) gives:

$$\begin{aligned}
& [(\alpha_1 - \alpha_2)\varepsilon_{xx} + (\beta_1 - \beta_2)\varepsilon_{yy} + (\chi_1 - \chi_2)\varepsilon_{xy}]^2 + 4(\alpha_3\varepsilon_{xx} + \beta_3\varepsilon_{yy} + \chi_3\varepsilon_{xy})^2 \\
& \equiv \left\{ \left[ \frac{1}{4}(\alpha_1 - \alpha_2) + \frac{3}{4}(\beta_1 - \beta_2) - \frac{\sqrt{3}}{4}(\chi_1 - \chi_2) \right] \varepsilon_{xx} \right. \\
& \quad + \left[ \frac{3}{4}(\alpha_1 - \alpha_2) + \frac{1}{4}(\beta_1 - \beta_2) + \frac{\sqrt{3}}{4}(\chi_1 - \chi_2) \right] \varepsilon_{yy} \\
& \quad \left. + \left[ \frac{\sqrt{3}}{2}(\alpha_1 - \alpha_2 - \beta_1 + \beta_2) + \frac{1}{2}(\chi_1 - \chi_2) \right] \varepsilon_{xy} \right\}^2 \\
& \quad + 4 \left\{ \left( \frac{1}{4}\alpha_3 + \frac{3}{4}\beta_3 - \frac{\sqrt{3}}{4}\chi_3 \right) \varepsilon_{xx} + \left( \frac{3}{4}\alpha_3 + \frac{1}{4}\beta_3 + \frac{\sqrt{3}}{4}\chi_3 \right) \varepsilon_{yy} \right. \\
& \quad \left. + \left[ \frac{\sqrt{3}}{2}(\alpha_3 - \beta_3) + \frac{1}{2}\chi_3 \right] \varepsilon_{xy} \right\}^2
\end{aligned} \tag{15}$$

Combined with Eq. (14), Eq. (15) reduces to:

$$\begin{aligned}
& (-2\Delta\alpha\varepsilon_{xx} + 2\Delta\alpha\varepsilon_{yy} + 2\chi_1\varepsilon_{xy})^2 + 4 \left( \alpha_3\varepsilon_{xx} - \alpha_3\varepsilon_{yy} + \frac{\Delta\alpha\chi_1}{\alpha_3}\varepsilon_{xy} \right)^2 \\
& \equiv \left\{ \left[ \frac{1}{2}\Delta\alpha + \frac{3}{2}\Delta\alpha - \frac{\sqrt{3}}{2}\chi_1 \right] \varepsilon_{xx} + \left[ -\frac{3}{2}\Delta\alpha + \frac{1}{2}\Delta\alpha + \frac{\sqrt{3}}{2}\chi_1 \right] \varepsilon_{yy} + (2\sqrt{3}\Delta\alpha + \chi_1)\varepsilon_{xy} \right\}^2 \\
& \quad + 4 \left[ \left( \frac{1}{4}\alpha_3 - \frac{3}{4}\alpha_3 - \frac{\sqrt{3}}{4}\frac{\Delta\alpha\chi_1}{\alpha_3} \right) \varepsilon_{xx} + \left( \frac{3}{4}\alpha_3 - \frac{1}{4}\alpha_3 + \frac{\sqrt{3}}{4}\frac{\Delta\alpha\chi_1}{\alpha_3} \right) \varepsilon_{yy} \right. \\
& \quad \left. + \left( \sqrt{3}\alpha_3 + \frac{1}{2}\frac{\Delta\alpha\chi_1}{\alpha_3} \right) \varepsilon_{xy} \right]^2
\end{aligned} \tag{16}$$

It is equivalent to

$$\begin{aligned}
& [-2\Delta\alpha(\varepsilon_{xx} - \varepsilon_{yy}) + 2\chi_1\varepsilon_{xy}]^2 + 4 \left( \alpha_3(\varepsilon_{xx} - \varepsilon_{yy}) + \frac{\Delta\alpha\chi_1}{\alpha_3}\varepsilon_{xy} \right)^2 \\
& \equiv \left[ \left( \Delta\alpha - \frac{\sqrt{3}}{2}\chi_1 \right) (\varepsilon_{xx} - \varepsilon_{yy}) + (2\sqrt{3}\Delta\alpha + \chi_1)\varepsilon_{xy} \right]^2 \\
& \quad + 4 \left[ \left( -\frac{1}{2}\alpha_3 - \frac{\sqrt{3}}{4}\frac{\Delta\alpha\chi_1}{\alpha_3} \right) (\varepsilon_{xx} - \varepsilon_{yy}) + \left( \sqrt{3}\alpha_3 + \frac{1}{2}\frac{\Delta\alpha\chi_1}{\alpha_3} \right) \varepsilon_{xy} \right]^2
\end{aligned}$$

(17)

Both sides whose corresponding terms are equal, so we have:

$$\left\{ \begin{array}{l} 4(\Delta\alpha)^2 + 4\alpha_3^2 = \left(\Delta\alpha - \frac{\sqrt{3}}{2}\chi_1\right)^2 + 4\left(\frac{1}{2}\alpha_3 + \frac{\sqrt{3}\Delta\alpha\chi_1}{4\alpha_3}\right)^2 \\ 4\chi_1^2 + 4\left(\frac{\Delta\alpha\chi_1}{\alpha_3}\right)^2 = (2\sqrt{3}\Delta\alpha + \chi_1)^2 + 4\left(\sqrt{3}\alpha_3 + \frac{1}{2}\frac{\Delta\alpha\chi_1}{\alpha_3}\right)^2 \\ -4\Delta\alpha\chi_1 + 4\alpha_3\frac{\Delta\alpha\chi_1}{\alpha_3} = 0 = \left(\Delta\alpha - \frac{\sqrt{3}}{2}\chi_1\right)(2\sqrt{3}\Delta\alpha + \chi_1) - 4\left(\frac{1}{2}\alpha_3 + \frac{\sqrt{3}\Delta\alpha\chi_1}{4\alpha_3}\right)\left(\sqrt{3}\alpha_3 + \frac{1}{2}\frac{\Delta\alpha\chi_1}{\alpha_3}\right) \end{array} \right. \quad (18)$$

The definition  $\chi_3 = \frac{\Delta\alpha\chi_1}{\alpha_3}$  is meaningless at  $\chi_1 = \alpha_3 = 0$ . If we regard  $\chi_3$  as an independent parameter, one solution of Eq. (17) is:

$$\left\{ \begin{array}{l} \chi_1 = \alpha_3 = 0 \\ \chi_3 = \frac{\Delta\alpha\chi_1}{\alpha_3} = \pm 2\Delta\alpha \end{array} \right. \quad (19)$$

If we plug these relationships from Eqs. (14, 19) into the eigenvalue Eq. (5), the split frequencies of degenerate mode will be:

$$\omega_{1,2} = \omega_0 + \bar{\alpha}(\varepsilon_{xx} + \varepsilon_{yy}) \pm \Delta\alpha \sqrt{(\varepsilon_{xx} - \varepsilon_{yy})^2 + 4\varepsilon_{xy}^2} \quad (20)$$

This gives a universal formulation linking strain and the frequencies of the split doubly degenerate modes.

## 2) The response curves of Raman frequencies with uniaxial and shear strains

Let us return to the evolutions of Raman shifts with uniaxial strain and shear strain in graphene, graphyne (GY), and graphdiyne (GDY), which are presented in Figure 5. The response curves of Raman frequencies to strains are fitted by quadratic functions; generally, they can be expressed as  $\omega = B2 \times \varepsilon^2 + B1 \times \varepsilon + B0$ , where  $B0, B1$ , and  $B2$  are the intercept, monomial, and quadratic coefficients, respectively, and the ratio between  $B2$  and  $B1$  ( $B2/B1$ ) can reflect the relative contribution of nonlinear effects to some extent;  $\varepsilon$  is the applied strain; and  $\omega$  is the corresponding frequency. Most often, when the applied strain is small, the frequency can be assumed to be linearly associated with the strain. Inevitably there are still some nonlinear effects, which are unified into quadratic terms. The detailed values of  $B1$  and  $B2$  are presented in Tables S1 and S2. However, the  $B2$  values are much smaller than the  $B1$  values, so the most important contributors in this system are the linear terms. The  $B2/B1$  ratios under shear strain are generally greater than under uniaxial strain, which means the nonlinear effects by shear strain are more obvious than uniaxial strain. There are two possible reasons for

these effects: one is the variations of structures under shear strain are stronger, another reason maybe attribute to the nonlinearly transition from structure to frequency. Thus, under uniaxial strain, we consider the strain from -4% to +4%, but under shear strain, where the strain was restrained to [-3%, +3%] to reduce errors by nonlinear effects.

**Table S1.** Response curves coefficients linking frequencies with uniaxial strain

|          |                               | B1 (cm <sup>-1</sup> /%) | B2 (cm <sup>-1</sup> /%) <sup>2</sup> | B2/B1  |
|----------|-------------------------------|--------------------------|---------------------------------------|--------|
| graphene | G <sub>x</sub> <sup>+</sup>   | -23.8                    | 0.37                                  | -0.015 |
|          | G <sub>x</sub> <sup>-</sup>   | -36.8                    | 0.26                                  | -0.007 |
|          | G <sub>y</sub> <sup>+</sup>   | -22.9                    | 0.27                                  | -0.011 |
|          | G <sub>y</sub> <sup>-</sup>   | -36.2                    | 0.12                                  | -0.003 |
| GY       | B <sub>x</sub>                | -26.8                    | 0.15                                  | -0.006 |
|          | B <sub>y</sub>                | -26.3                    | 0.17                                  | -0.006 |
|          | G <sub>x</sub> <sup>+</sup>   | -26.8                    | 0.21                                  | -0.008 |
|          | G <sub>x</sub> <sup>-</sup>   | -30.7                    | 0.42                                  | -0.014 |
|          | G <sub>y</sub> <sup>+</sup>   | -26.3                    | 0.42                                  | -0.016 |
|          | G <sub>y</sub> <sup>-</sup>   | -30.5                    | 0.74                                  | -0.024 |
|          | Y <sub>x</sub>                | -30.2                    | -1.97                                 | 0.065  |
|          | Y <sub>y</sub>                | -26.2                    | -1.79                                 | 0.068  |
| GDY      | B <sub>x</sub>                | -20.0                    | 0.16                                  | -0.008 |
|          | B <sub>y</sub>                | -19.8                    | 0.16                                  | -0.008 |
|          | G'' <sub>x</sub> <sup>+</sup> | -23.4                    | 0.08                                  | -0.003 |
|          | G'' <sub>x</sub> <sup>-</sup> | -34.3                    | -1.39                                 | 0.040  |
|          | G'' <sub>y</sub> <sup>+</sup> | -24.6                    | 0.78                                  | -0.032 |
|          | G'' <sub>y</sub> <sup>-</sup> | -33.2                    | 0.68                                  | -0.020 |
|          | G' <sub>x</sub>               | -35.6                    | -0.87                                 | 0.024  |
|          | G' <sub>y</sub>               | -33.4                    | -0.48                                 | 0.014  |
|          | G <sub>x</sub> <sup>+</sup>   | -25.8                    | 0.37                                  | -0.014 |
|          | G <sub>x</sub> <sup>-</sup>   | -38.5                    | 1.87                                  | -0.049 |
|          | G <sub>y</sub> <sup>+</sup>   | -26.3                    | 2.23                                  | -0.085 |
|          | G <sub>y</sub> <sup>-</sup>   | -39.9                    | 0.33                                  | -0.008 |
|          | Y <sub>x</sub>                | -35.1                    | -2.18                                 | 0.062  |
|          | Y <sub>y</sub>                | -30.8                    | -2.09                                 | 0.068  |
|          | Y' <sub>x</sub> <sup>+</sup>  | -23.0                    | 0.13                                  | -0.006 |
|          | Y' <sub>x</sub> <sup>-</sup>  | -44.0                    | 2.79                                  | -0.063 |
|          | Y' <sub>y</sub> <sup>+</sup>  | -25.3                    | 2.49                                  | -0.098 |

$Y'_y$

-45.9

0.20

-0.004

---



**Table S2.** Response curves coefficients linking frequencies with shear strain

|          |                  | B1 (cm <sup>-1</sup> /%) | B2 (cm <sup>-1</sup> /‰ <sup>2</sup> ) | B2/B1  |
|----------|------------------|--------------------------|----------------------------------------|--------|
| graphene | G <sub>+</sub>   | -3.08                    | -3.21                                  | 1.042  |
|          | G <sub>-</sub>   | 6.16                     | 2.73                                   | 0.443  |
| GY       | B                | -0.30                    | 0.57                                   | -1.900 |
|          | G <sub>+</sub>   | -4.50                    | -1.01                                  | 0.224  |
|          | G <sub>-</sub>   | 1.51                     | -0.23                                  | -0.152 |
|          | Y                | -11.8                    | -4.12                                  | 0.349  |
|          | B                | 1.29                     | 0.00                                   | 0.000  |
| GDY      | G'' <sub>+</sub> | -9.41                    | -3.48                                  | 0.370  |
|          | G'' <sub>-</sub> | 10.8                     | -3.24                                  | -0.300 |
|          | G'               | -5.52                    | -1.6                                   | 0.290  |
|          | G <sub>+</sub>   | -9.49                    | 0.96                                   | -0.101 |
|          | G <sub>-</sub>   | 16.5                     | 2.83                                   | 0.172  |
|          | Y                | -8.3                     | -6.48                                  | 0.781  |
|          | Y' <sub>+</sub>  | -18.2                    | 2.42                                   | -0.133 |
|          | Y' <sub>-</sub>  | 27.6                     | 1.58                                   | 0.057  |
|          |                  |                          |                                        |        |

### 3) Variations of bond lengths and angles versus uniaxial strain and shear strain

Figures S1 and S2 show the variations in bond lengths and angles with uniaxial strain and shear strain, respectively. The structures of graphene, GY, and GDY are shown in Figure 1 of main text.  $r_1$  is the length of the aromatic bond on the benzene ring,  $r_2$  is the length of the C–C bond between the triply coordinated atom and its doubly coordinated neighbor,  $r_3$  is the length of the C  $\equiv$  C triple bond, and  $r_4$  is the length of the bond between adjacent carbon triple bonds. There are only two kinds of angles (120° and 180°) in the initial states for the three structures, but they all changed under strain.  $\theta_1$  is an internal angle of the benzene ring, and  $\theta_2$  is the angle on the alkyne-containing chain and links the aromatic bond with the triple bond. All the other angles can be deduced from  $\theta_1, \theta_2$  or are nearly invariable, so they are ignored. When uniaxial strain is applied, the original  $D_{6h}$  ( $P6/mmm$ ) symmetry is transformed into rhombic  $D_{2h}$  ( $Pmmm$ ) symmetry. However, if shear strain is applied, the symmetry will reduce to monoclinic  $C_{2h}$  ( $P2/m$ ). To relax the strained structure, the bond lengths and angles changed differently between uniaxial strain and shear strain, leading to the different behaviors of the vibrational frequencies.

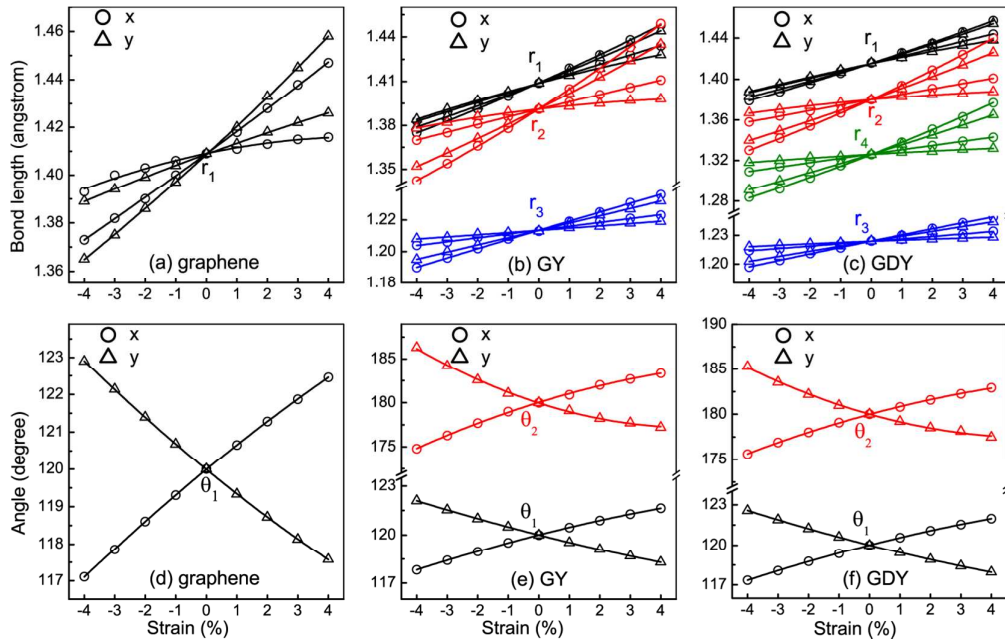

**Figure S1.** Variations in bond lengths and angles with uniaxial strain. The bond lengths of graphene, GY, and GDY are shown in (a), (b), and (c); the bond angles of those are shown in (d), (e), and (f). Squares and triangles correspond to the values under uniaxial strain in the  $x$  and  $y$  directions, respectively. Different colors correspond to different bond lengths or angles.

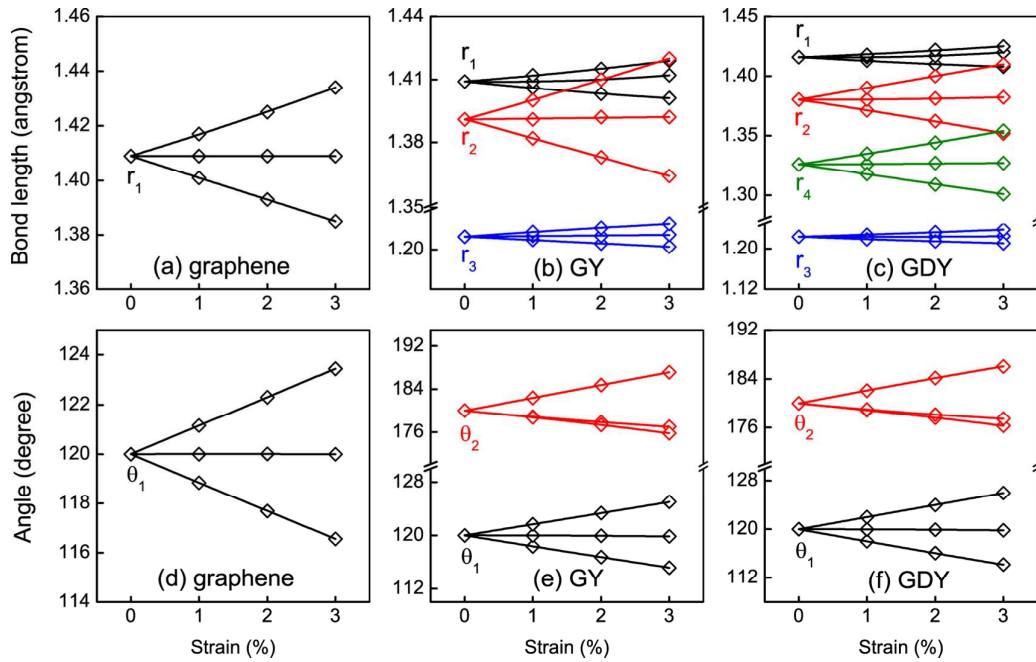

**Figure S2.** Variations in bond lengths and angles with shear strain. The bond lengths of graphene, GY, and GDY are shown in (a), (b), and (c); the bond angles are shown in (d), (e), and (f). Squares and

triangles correspond to the values under uniaxial strain in  $x$  and  $y$  directions. Different colors correspond to different bond lengths or angles.

#### 4) The effects of van der Waals interactions on the frequency of G band.

We adopte the non-local van der Waals density functional (vdW-DF) and explored the performance of vdW-DF combined with PBE functional to investigate the effects of vdW interactions. Table R1 shows the frequencies of G peaks for graphene, GY and GDY by different methods based on optimized structures.

Table S3. The frequency of G band by different methods ( $\text{cm}^{-1}$ ).

|         | $\omega(\text{graphene})$ | $\omega(\text{GY})$ | $\omega(\text{GDY})$ | $\omega(\text{GY})$<br>$-\omega(\text{graphene})$ | $\omega(\text{GDY})$<br>$-\omega(\text{graphene})$ |
|---------|---------------------------|---------------------|----------------------|---------------------------------------------------|----------------------------------------------------|
| LDA     | 1620                      | 1464                | 1520                 | -156                                              | -100                                               |
| PBE     | 1568                      | 1418                | 1478                 | -150                                              | -90                                                |
| PBE+vdW | 1557                      | 1398                | 1457                 | -159                                              | -100                                               |
